# Supplementary material
Source: HighWire-hosted journal article supplement (https://bmjophth.bmj.com/content/8/1/e001164)
Supplement: inline-supplementary-material-1 [file inline-supplementary-material-1.pdf]

Table 1

|                                                                             | Overall n<br>(%) | Liverpool n<br>(%) | Newcastle n<br>(%) | Baltimore n<br>(%) | Dublin n<br>(%) |
|-----------------------------------------------------------------------------|------------------|--------------------|--------------------|--------------------|-----------------|
| <b>Question 1 What is keratoconus?</b>                                      |                  |                    |                    |                    |                 |
| - Thinning of the cornea                                                    | 45 (22.5)        | 21 (42.0)          | 9 (18.0)           | 5 (10.0)           | 10 (20.0)       |
| - Irregular astigmatism                                                     | 67 (33.5)        | 28 (56.0)          | 24 (48.0)          | 9 (18.0)           | 6 (12.0)        |
| - Protrusion of the cornea                                                  | 80 (40.0)        | 8 (16.0)           | 25 (50.0)          | 11 (22.0)          | 36 (72.0)       |
| <b>Question 2 Are there risk factors for the occurrence of keratoconus?</b> |                  |                    |                    |                    |                 |
| - Positive family history                                                   | 63 (31.5)        | 22 (44.0)          | 8 (16.0)           | 14 (28.0)          | 19 (38.0)       |
| - Allergies                                                                 | 26 (13.0)        | 12 (24.0)          | 4 (8.0)            | 5 (10.0)           | 5 (10.0)        |
| - Eye rubbing                                                               | 111 (55.5)       | 33 (66.0)          | 21 (42.0)          | 16 (32.0)          | 41 (82.0)       |
| <b>Question 3 What are symptoms of keratoconus?</b>                         |                  |                    |                    |                    |                 |
| - Blurred vision (short-sightedness)                                        | 150 (75.0)       | 35 (70.0)          | 43 (86.0)          | 30 (60.0)          | 42 (84.0)       |
| - Double/distorted vision (astigmatism)                                     | 58 (29.0)        | 30 (60.0)          | 11 (22.0)          | 8 (16.0)           | 9 (18.0)        |
| - Light sensitivity                                                         | 33 (16.5)        | 17 (34.0)          | 6 (12.0)           | 4 (8.0)            | 6 (12.0)        |
| <b>Question 4 What are consequences of untreated keratoconus?</b>           |                  |                    |                    |                    |                 |
| - Visual deterioration                                                      | 150 (75.0)       | 36 (72.0)          | 39 (78.0)          | 27 (54.0)          | 48 (96.0)       |
| - Inability to wear glasses                                                 | 11 (5.5)         | 6 (12.0)           | 2 (4.0)            | 0 (0)              | 3 (6.0)         |
| - Inability to wear contact lenses                                          | 11 (5.5)         | 2 (4.0)            | 8 (16.0)           | 50 (100)           | 2 (4.0)         |
| - Restriction of current occupation                                         | 10 (5.0)         | 8 (16.0)           | 1 (2.0)            | 1 (2.0)            | 1 (2.0)         |
| - Need for a corneal transplant                                             | 57 (28.5)        | 25 (50)            | 11 (22.0)          | 10 (20.0)          | 11 (22.0)       |
| <b>Question 5 What are treatment options for keratoconus?</b>               |                  |                    |                    |                    |                 |
| - Glasses                                                                   | 40 (20.0)        | 12 (25.0)          | 15 (30.0)          | 7 (14.0)           | 5 (10.0)        |
| - Rigid contact lenses                                                      | 102 (51.0)       | 25 (50.0)          | 32 (64.0)          | 30 (60.0)          | 15 (30.0)       |

---

|                         |            |           |           |           |           |
|-------------------------|------------|-----------|-----------|-----------|-----------|
| - Corneal cross-linking | 133 (66.5) | 42 (84.0) | 26 (52.0) | 19 (38.0) | 46 (92.0) |
| - Corneal transplant    | 98 (49.0)  | 32 (64.0) | 16 (32.0) | 18 (36.0) | 32 (64.0) |

---

The MKK is computed in the following way. There are five questions for which the minimal correct answers vary between three and five. The total number of correct answers is 18. The MKK of a person is the total number of correct replies times 100 divided by 18. Please note that MKK measures only the minimal knowledge. Additional knowledge that may be important is not measured. Percentage () of correct participants' (n = 200) answers are displayed.
